# Supplementary material for: Transport and Attenuation of an Artificial Sweetener and Six Pharmaceutical Compounds in a Sequenced Wetland-Steel Slag Wastewater Treatment System
Source: MDPI journal article supplement (doi:10.3390/w15152835), 2023-08-05
Supplement: s1 [file s1]

## **Supplementary information**

**for**

### **Transport and attenuation of an artificial sweetener and six pharmaceutical compounds in a sequenced wetland-steel slag wastewater treatment system**

Syed I. Hussain<sup>1</sup>, Carol J. Ptacek<sup>1</sup>, David W. Blowes<sup>1</sup>, YingYing Liu<sup>1, 2, \*</sup>, Brent C. Wootton<sup>3</sup>, Gordon Balch<sup>3</sup>, and James Higgins<sup>4</sup>

<sup>1</sup>Department of Earth and Environmental Sciences, University of Waterloo, Waterloo, Ontario, Canada N2L 3G1

<sup>2</sup>Key Laboratory of Groundwater Resources and Environment, Ministry of Education, Jilin University, Changchun, China 130021

<sup>3</sup>Centre for Alternative Wastewater Treatment, Fleming College, Lindsay, Ontario, Canada K9V 5E6

<sup>4</sup>Environmental Technologies Development Corporation, Mississauga, Ontario, Canada L5K 2C9

---

\* Corresponding author. E-mail address: [yy4liu@uwaterloo.ca](mailto:yy4liu@uwaterloo.ca)

Present address: Department of Earth and Environmental Sciences, 200 University Avenue West, Waterloo, Ontario, Canada N2L 3G1

**Table S1.** Chemical properties and structures of target pharmaceutically active compounds and artificial sweetener acesulfame.

| Name                                    | Drug Class                         | Chemical Structure                                                                 | log $K_{ow}$ | p $K_a$  |
|-----------------------------------------|------------------------------------|------------------------------------------------------------------------------------|--------------|----------|
| Carbamazepine<br>Carbamazepine-d10      | Anticonvulsant,<br>antidepressant  | 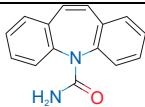  | 2.45         | 13.9     |
| Sulfamethoxazole<br>Sulfamethoxazole-d4 | Antibiotic                         |  | 0.89         | 1.7, 5.6 |
| Caffeine<br>Caffeine-d3                 | Stimulant                          |  | -0.07        | 10.4     |
| Naproxen<br>Naproxen-13C                | Non-steroidal<br>anti-inflammatory |  | 3.18         | 4.15     |
| Ibuprofen<br>Ibuprofen-d3               | Non-steroidal<br>anti-inflammatory |  | 3.97         | 4.91     |
| Acesulfame<br>Acesulfame-d4             | Artificial<br>sweetener            |  | -1.33        | 2.0      |

Note: p $K_a$  and log  $K_{ow}$  of target compounds were obtained from Chemicalize.org by ChemAxon (<http://www.chemicalize.org>).



**Table S3.** P-values obtained from t-Test, two-sample assuming unequal variances, for Cells 1-2, 2-3, 3-4, 1-3, 1-4, and 2-4 for the selected contaminants, including caffeine (CAF), carbamazepine (CBZ), sulfamethoxazole (SMX), ibuprofen (IBU), naproxen (NAP), and an artificial sweetener, acesulfame (ACE).

| P(T<=t) two-tail | Cell 1-2 | Cell 1-3 | Cell 1-4 | Cell 2-3 | Cell 2-4 | Cell 3-4 |
|------------------|----------|----------|----------|----------|----------|----------|
| CAF              | 0.73     | 0.11     | 0.08     | 0.13     | 0.09     | 0.29     |
| CBZ              | 0.93     | 0.82     | 0.86     | 0.88     | 0.92     | 0.95     |
| SMX              | 0.46     | 0.40     | 0.32     | 0.87     | 0.75     | 0.89     |
| IBU              | 0.59     | 0.05     | 0.03     | 0.03     | 0.01     | 0.50     |
| NAP              | 0.45     | 0.75     | 0.19     | 0.33     | 0.05     | 0.40     |
| ACE              | 0.47     | 0.25     | 0.12     | 0.56     | 0.25     | 0.45     |

**Table S4.** Physical and chemical properties of the BOFS materials used in the experiments.

|                                |                                                              |
|--------------------------------|--------------------------------------------------------------|
| <b>BOFS</b>                    |                                                              |
| <b>Source:</b> Stelco Hamilton |                                                              |
| <b>Physical properties</b>     |                                                              |
| Particle size (mm)             | Surface area (m <sup>2</sup> g <sup>-1</sup> )               |
| 4-2                            | 6.05                                                         |
| 2-1                            | 8.98                                                         |
| 1-0.5                          | 11.5                                                         |
| <0.5                           | 13.9                                                         |
| Particle size (mm)             | Mass weighted surface area (m <sup>2</sup> g <sup>-1</sup> ) |
| 4-2                            | 154                                                          |
| 2-1                            | 196                                                          |
| 1-0.5                          | 250                                                          |
| <0.5                           | 429                                                          |
| Density (g cm <sup>-3</sup> ): | 3.49                                                         |
| <b>Chemical properties</b>     |                                                              |
| Chemical composition           | wt. %                                                        |
| CaO                            | 33.8                                                         |
| Fe <sub>2</sub> O <sub>3</sub> | 24.3                                                         |
| SiO <sub>2</sub>               | 11.3                                                         |
| MgO                            | 9.62                                                         |
| MnO                            | 4.08                                                         |
| Al <sub>2</sub> O <sub>3</sub> | 7.43                                                         |
| P <sub>2</sub> O <sub>5</sub>  | -                                                            |
| TiO <sub>2</sub>               | 0.38                                                         |
| K <sub>2</sub> O               | 0.03                                                         |
| Na <sub>2</sub> O              | 0.07                                                         |
| Cr <sub>2</sub> O <sub>3</sub> | -                                                            |
| Loss on ignition               | 8.96                                                         |

**Table S5.** Physical and chemical properties of the ZVI materials used in the experiments.

|                                                          |                                                |
|----------------------------------------------------------|------------------------------------------------|
| <b>ZVI</b>                                               |                                                |
| <b>Source:</b> Connelly GPM Inc., Chicago, Illinois, USA |                                                |
| <b>Physical properties</b>                               |                                                |
| Particle size (mm)                                       | Surface area (m <sup>2</sup> g <sup>-1</sup> ) |
| 0.297-2.38                                               | 4.4                                            |
| Density (g cm <sup>-3</sup> ):                           | 3.49                                           |
| <b>Chemical properties</b>                               |                                                |
| <b>Chemical composition</b>                              | <b>wt. %</b>                                   |
| Iron/Iron Oxide                                          | Balance                                        |
| Total Carbon                                             | 2.48                                           |
| Manganese                                                | 0.93                                           |
| Sulphur                                                  | 0.12                                           |
| Phosphorous                                              | ND                                             |
| Silicon                                                  | 0.35                                           |
| Nickel                                                   | >0.01                                          |
| Chromium                                                 | >0.01                                          |
| Vanadium                                                 | ND                                             |
| Molybdenum                                               | 0.33                                           |
| Copper                                                   | 0.10                                           |
| Aluminum                                                 | >0.01                                          |
| Magnesium                                                | 0.01                                           |
| Boron                                                    | 0.01                                           |
| Zinc                                                     | 0.01                                           |
| Zirconium                                                | 0.01                                           |

ND= Not Detectable

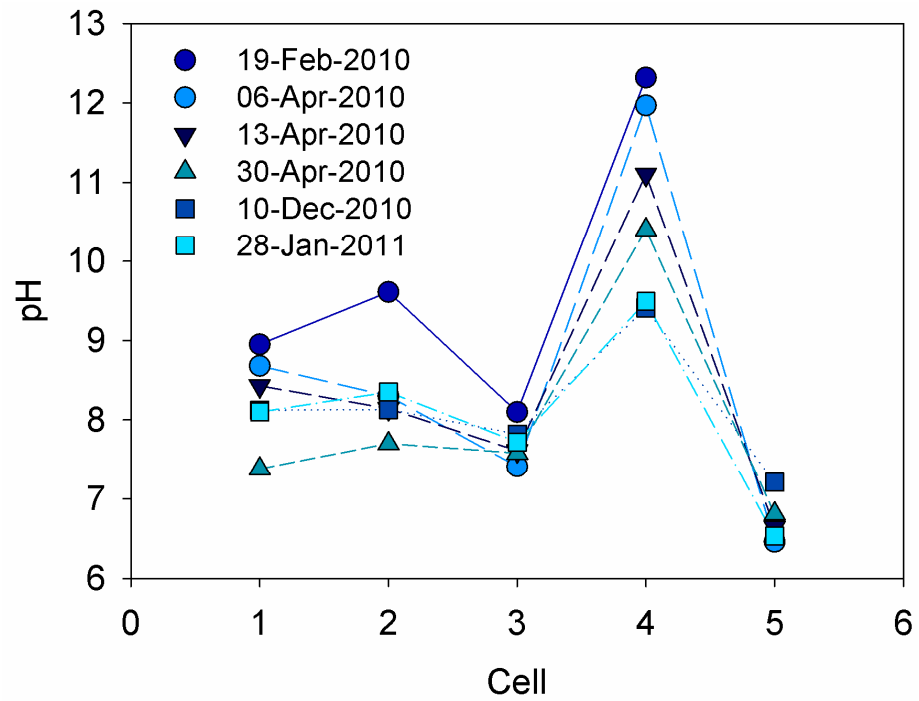

**Figure S1.** pH versus distance (Cells 1-5) along the treatment flow path.

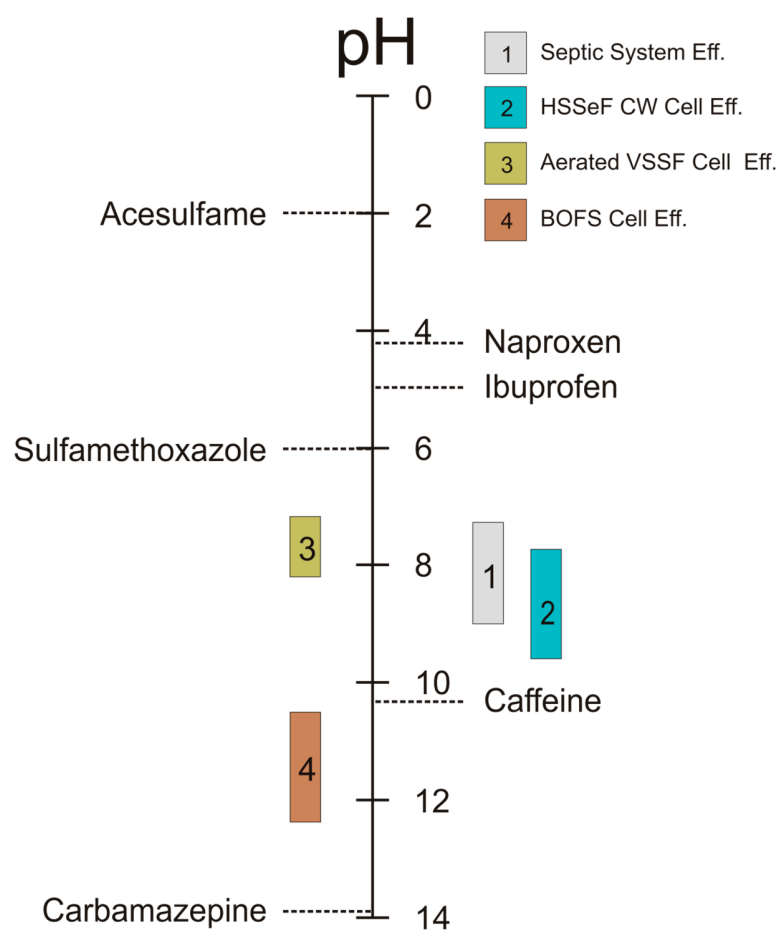

**Figure S2.**  $pK_a$  of each pharmaceutical of interest plotted on the pH scale with dotted lines and the pH range of the treatment cells (Cells 1-4) shown with vertical bars.



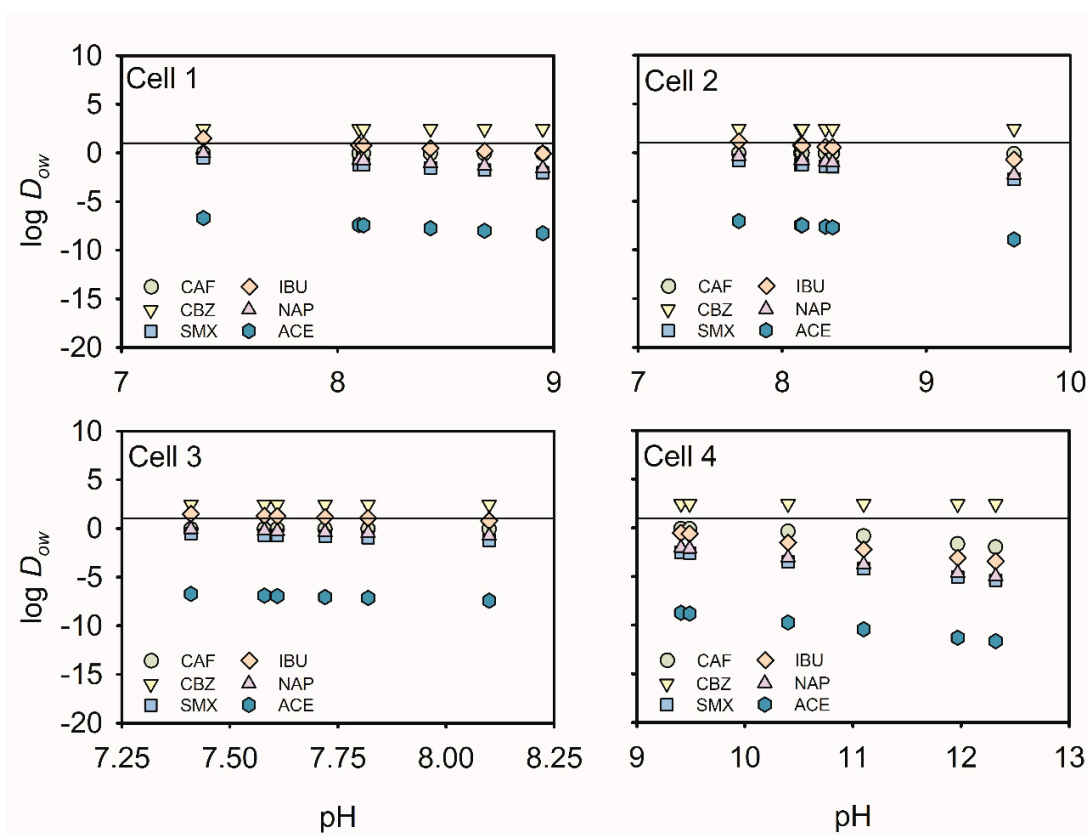

**Figure S3.** Calculated values of  $\log D_{ow}$  versus pH in the influent (Cell 1 effluent) and three other treatment cells (Cells 2, 3, and 4).
